# Supplementary material for: Hepato‐entrained B220+ CD11c+ NK1.1+ cells regulate pre‐metastatic niche formation in the lung
Source: PubMed Central journal article supplement (PMC6034134; doi:10.15252/emmm.201708643), 2018-06-21
Supplement: EMMM-10-e8643-s001.pdf [file EMMM-10-e8643-s001.pdf]

## **Appendix: Hepato-entrained B220<sup>+</sup>CD11c<sup>+</sup>NK1.1<sup>+</sup> cells regulate pre-metastatic niche formation in the lung**

### **Table of Contents:**

**Appendix Figure S1.** BM-derived CD45<sup>+</sup> cells showed FX expression in liver in tumour-bearing mice.

**Appendix Figure S2.** Representative immunohistochemical images of fibrinogen deposition in no tumour-bearing- and tumour-bearing- mouse lungs.

**Appendix Figure S3.** Flow cytometric analyses of spleen cells.

**Appendix Figure S4.** Flow cytometric analyses of lung cells derived from KikGR mice that blood perfusion were carried out.

**Appendix Figure S5.** Induction of HepEL relocation in TCM-stimulated lungs.

**Appendix Figure S6.** Gating strategy for lung cells that contained the relocated HepELs, which were photoconverted in liver in a TCM-stimulated KikGR mouse.

**Appendix Figure S7.** Tracing of B220<sup>+</sup>CD11c<sup>+</sup>NK1.1<sup>+</sup> cells in various organs such as lung, liver, bone marrow, peripheral blood, lymph node and primary tumours during the progression of tumour.

**Appendix Figure S8.** Quantification of fibrinogen deposition area in tumor-bearing wild-type (WT) and FX<sup>-/-</sup> mouse lungs.

**Appendix Figure S9.** Metastatic tumor cells in tumor-bearing FX<sup>-/-</sup> mouse lungs that were treated with wild-type, FX<sup>+/-</sup> or FX<sup>-/-</sup> HepELs.

**Appendix Table S1.** A list of the top 50 genes that were significantly up-regulated in peripheral leukocytes in LLC-bearing or B16-bearing mice.

**Appendix Figure S2.** Gene expression in photoconverted HepELs derived from TCM-stimulated- lungs and livers.

Appendix Fig. S1

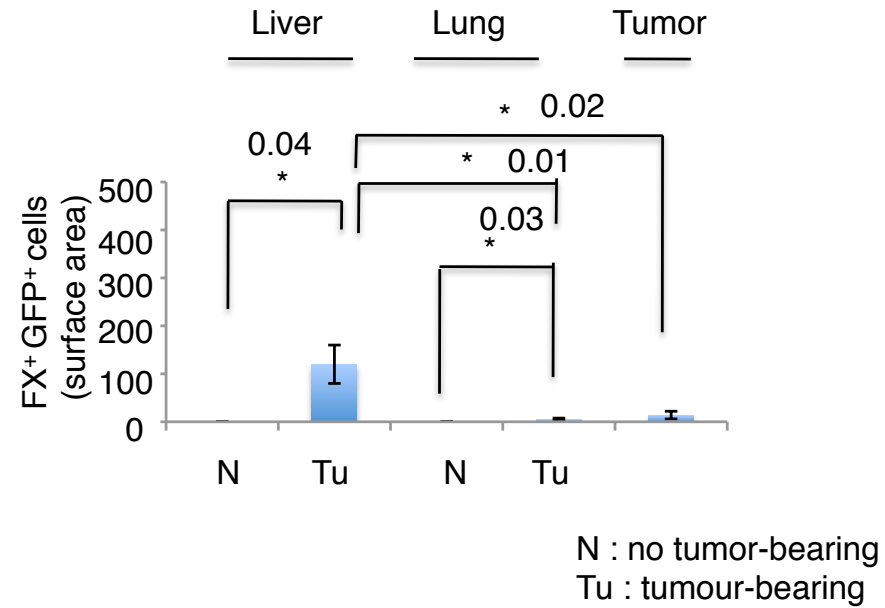

BM-derived CD45<sup>+</sup> cells showed FX expression in liver in tumour-bearing mice  
IHC examination was carried out in tumour-bearing- lung, liver and primary tumour (tumour diameter: 7 mm) that were derived from bone marrow transplantation (GFP<sup>+</sup>-BM) mice. N = 5.

Appendix Fig. S2

fibrinogen

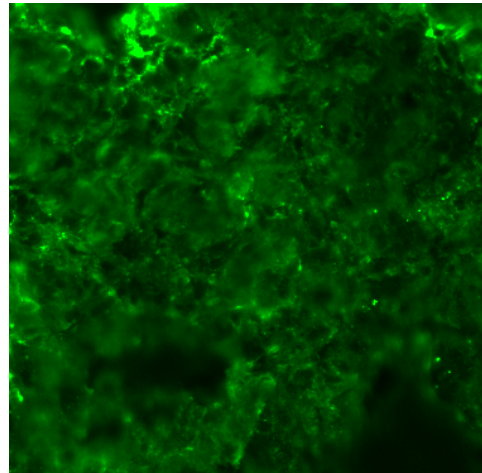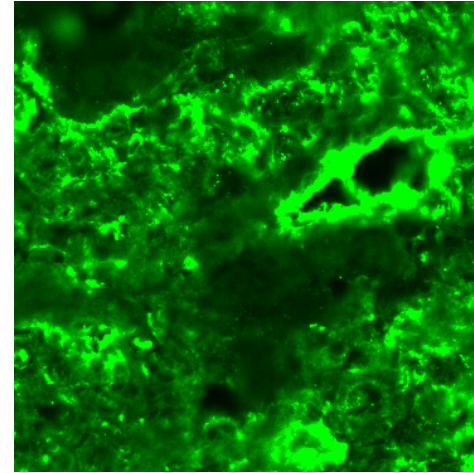

merged with DAPI

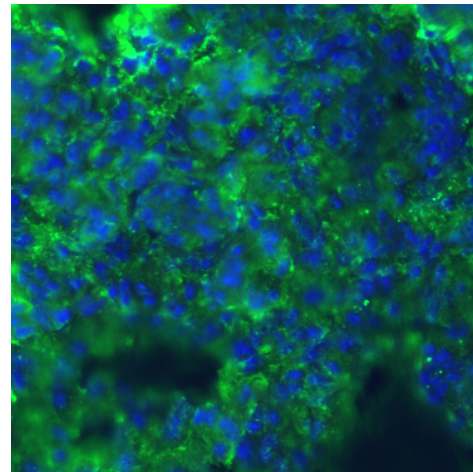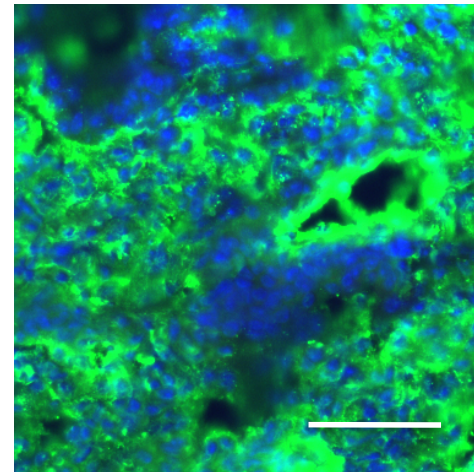

No tumour-bearing

Tumour-bearing

Representative immunohistochemical images of fibrinogen deposition in no tumour-bearing- and tumour-bearing- mouse lungs (scale bar, 50  $\mu$ m).

## Appendix Fig. S3

### Spleen

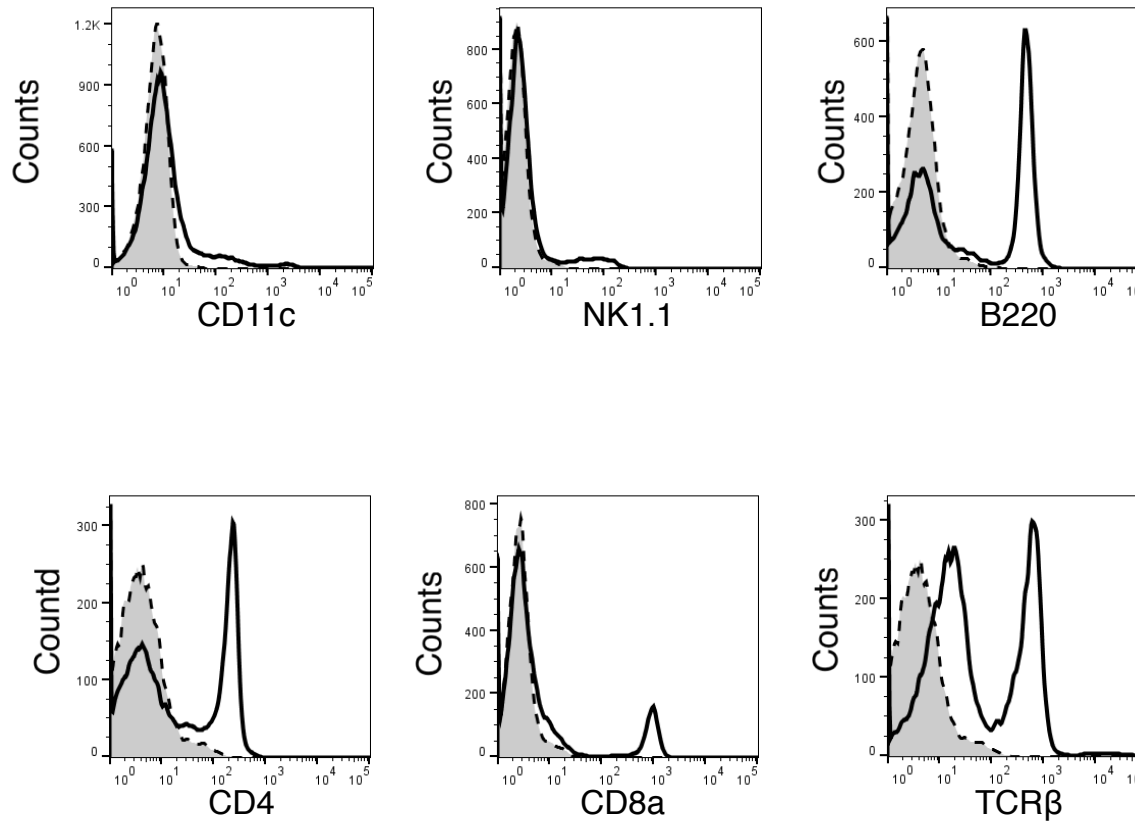

Flow cytometric analyses of spleen cells. Histograms of isotype control-Ab (dashed line) and specific-Ab (bold line) stained cells are depicted. The flow cytometric analyses in Fig. EV1 and Appendix Fig. 3-4 were carried out based on this staining. Some of Abs such as B220, CD4 and CD8 detected bright signals in spleen cells compared with lung cells.

# Appendix Fig. S4

lung

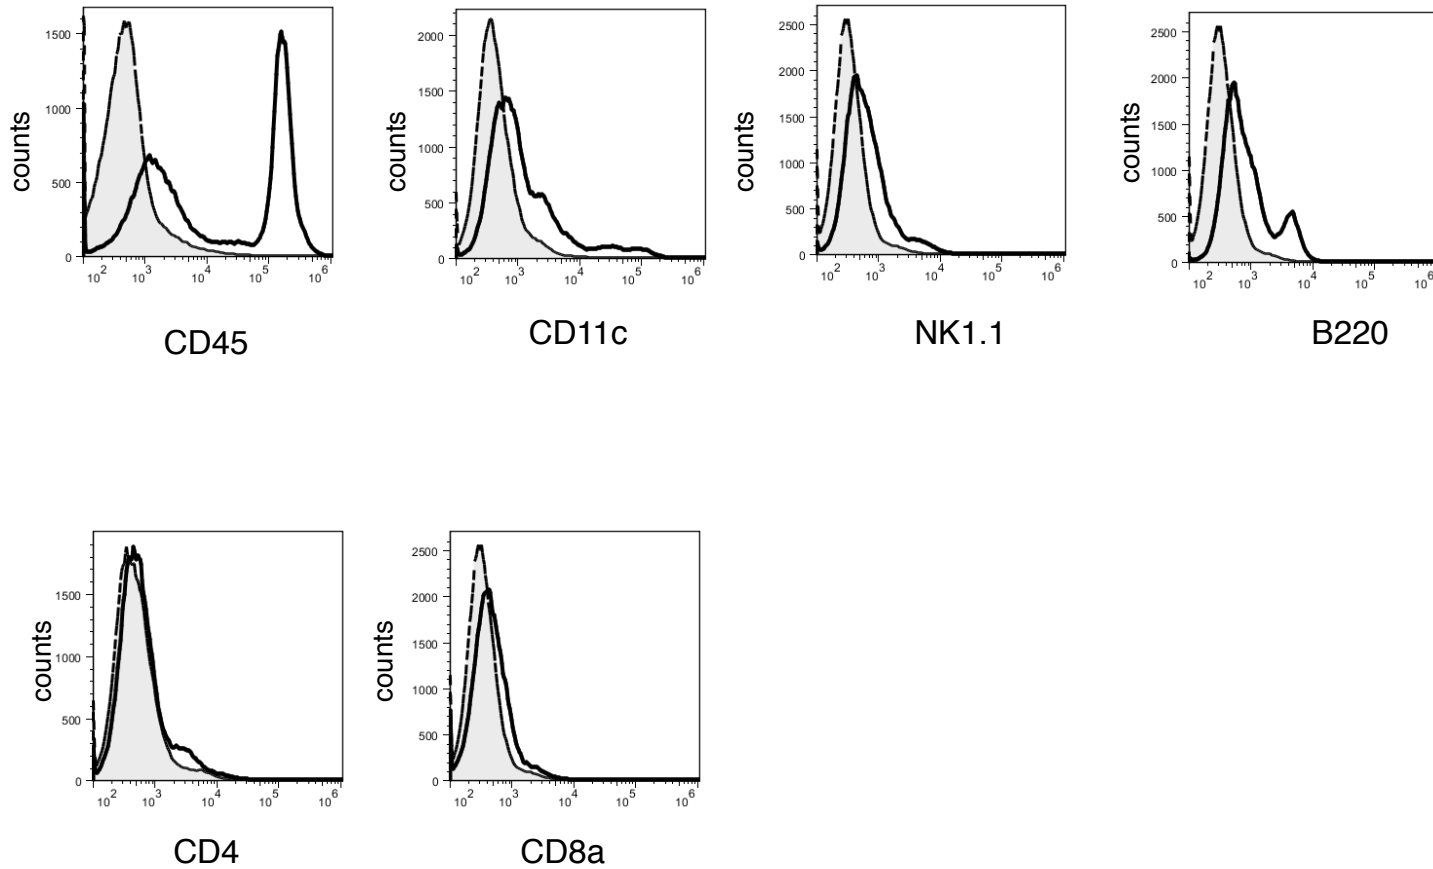

Flow cytometric analyses of lung cells derived from KikGR mice that blood perfusion were carried out. Histograms of isotype control-Ab (dashed line) and specific-Ab (bold line) stained cells are depicted. The flow cytometric analyses in Fig. EV1 and Appendix Fig. 3-4 were carried out based on this staining.

Appendix Fig. S5

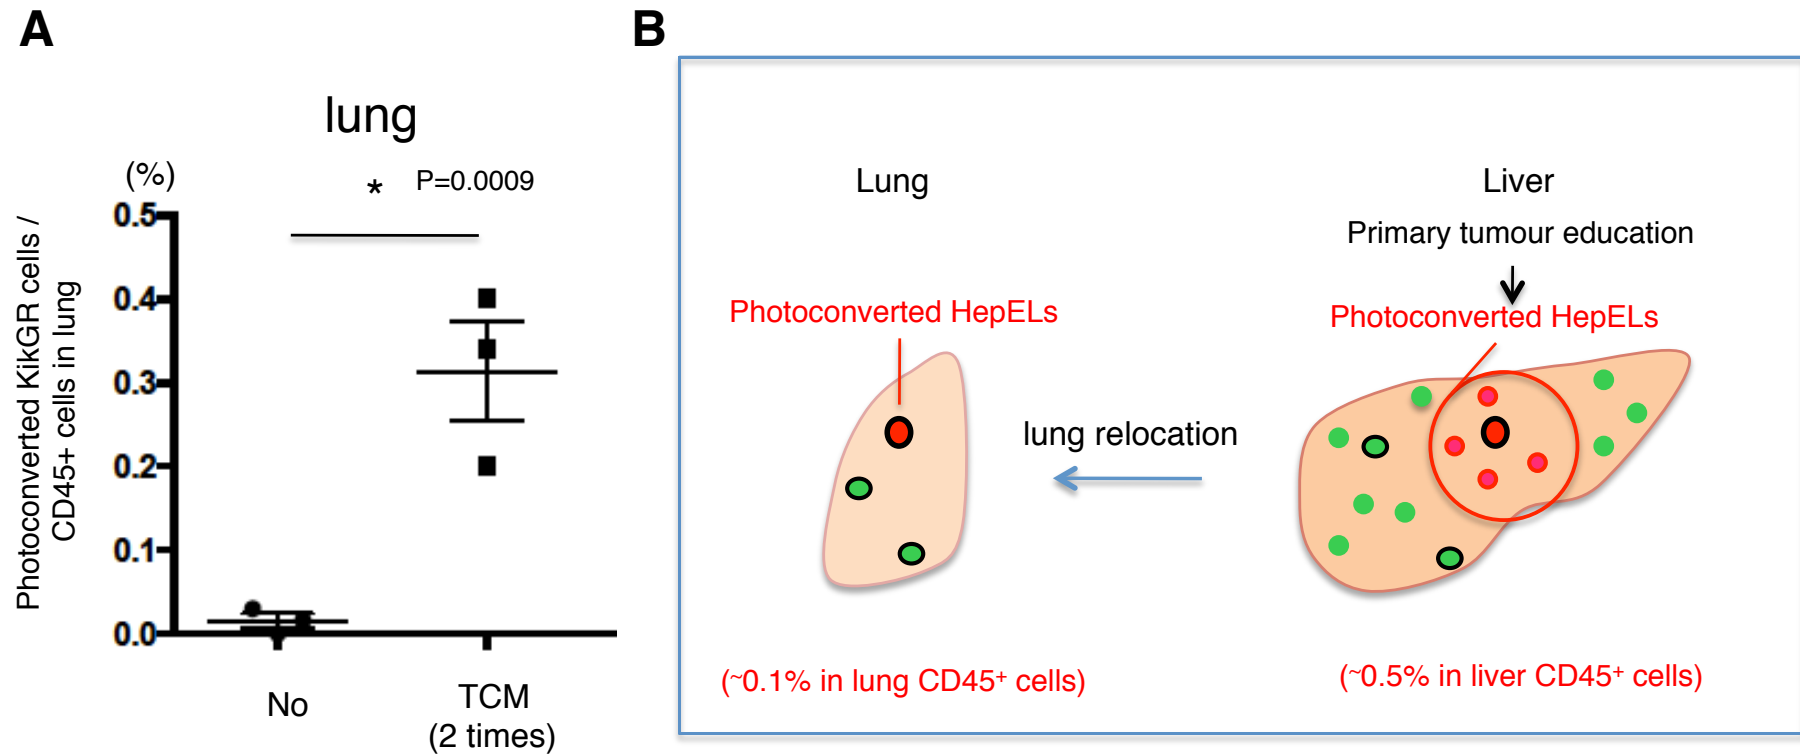

Induction of HepEL relocation in TCM-stimulated lungs. **(A)** Flow cytometric quantifications of the photoconverted (KikGR red) cells in lungs. No: no stimulation. N=3 (littermate), (No, TCM (2 times, every 2 days)). Shown are averages with SEM. Welch's t-test. **(B)** Experimental design is shown in right. A primary tumour induced the liver-to-lung relocation of HepELs (black-bordered). Red circle indicates light exposure area, and in this area, CD45+ cells received photoconversion. The data used for this calculation (%) are displayed in Fig. 2C.

# Appendix Fig. S6

Lung

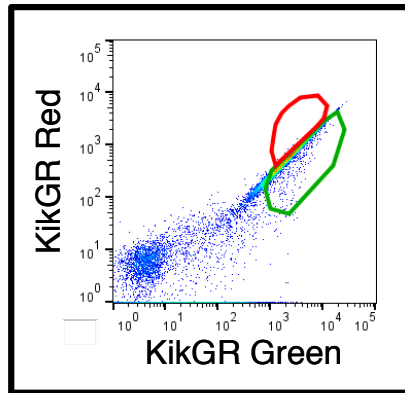

Total cells gated KikGR red and KikGR green

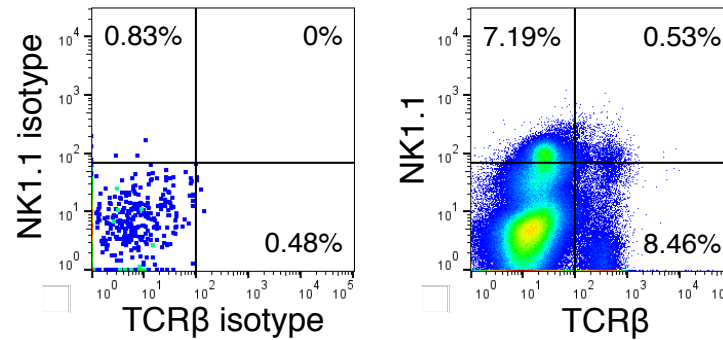

Merged

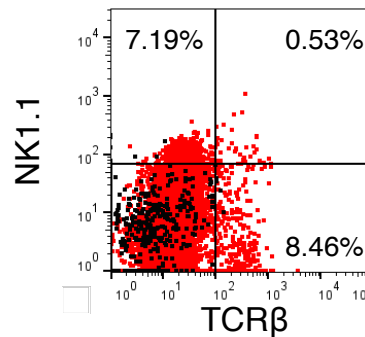

gated KikGR red cell

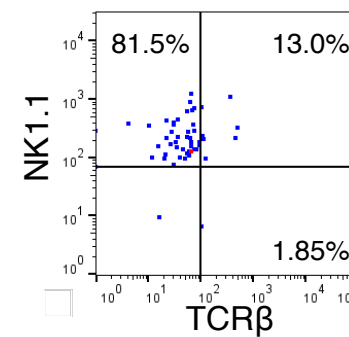

Gating strategy for lung cells that contained the relocated HepELs, which were photoconverted in liver in a TCM-stimulated KikGR mouse (gated in red polygonal region). Total cells gated KikGR red and KikGR green cell were separated using anti-NK1.1 and anti-TCR $\beta$  antibodies based on each isotype antibody. Percent is shown for total cells gated KikGR red and KikGR green cell (Merged). The gated KikGR red cells contained NK1.1<sup>+</sup>TCR $\beta$ <sup>-</sup> and NK1.1<sup>+</sup>TCR $\beta$ <sup>+</sup> dim but not NK1.1<sup>+</sup>TCR $\beta$ <sup>+</sup> T cells. Percent is shown for gated KikGR red cells (lower right).

# Appendix Fig. S7

B220<sup>+</sup>CD11c<sup>+</sup>NK1.1<sup>+</sup> cells

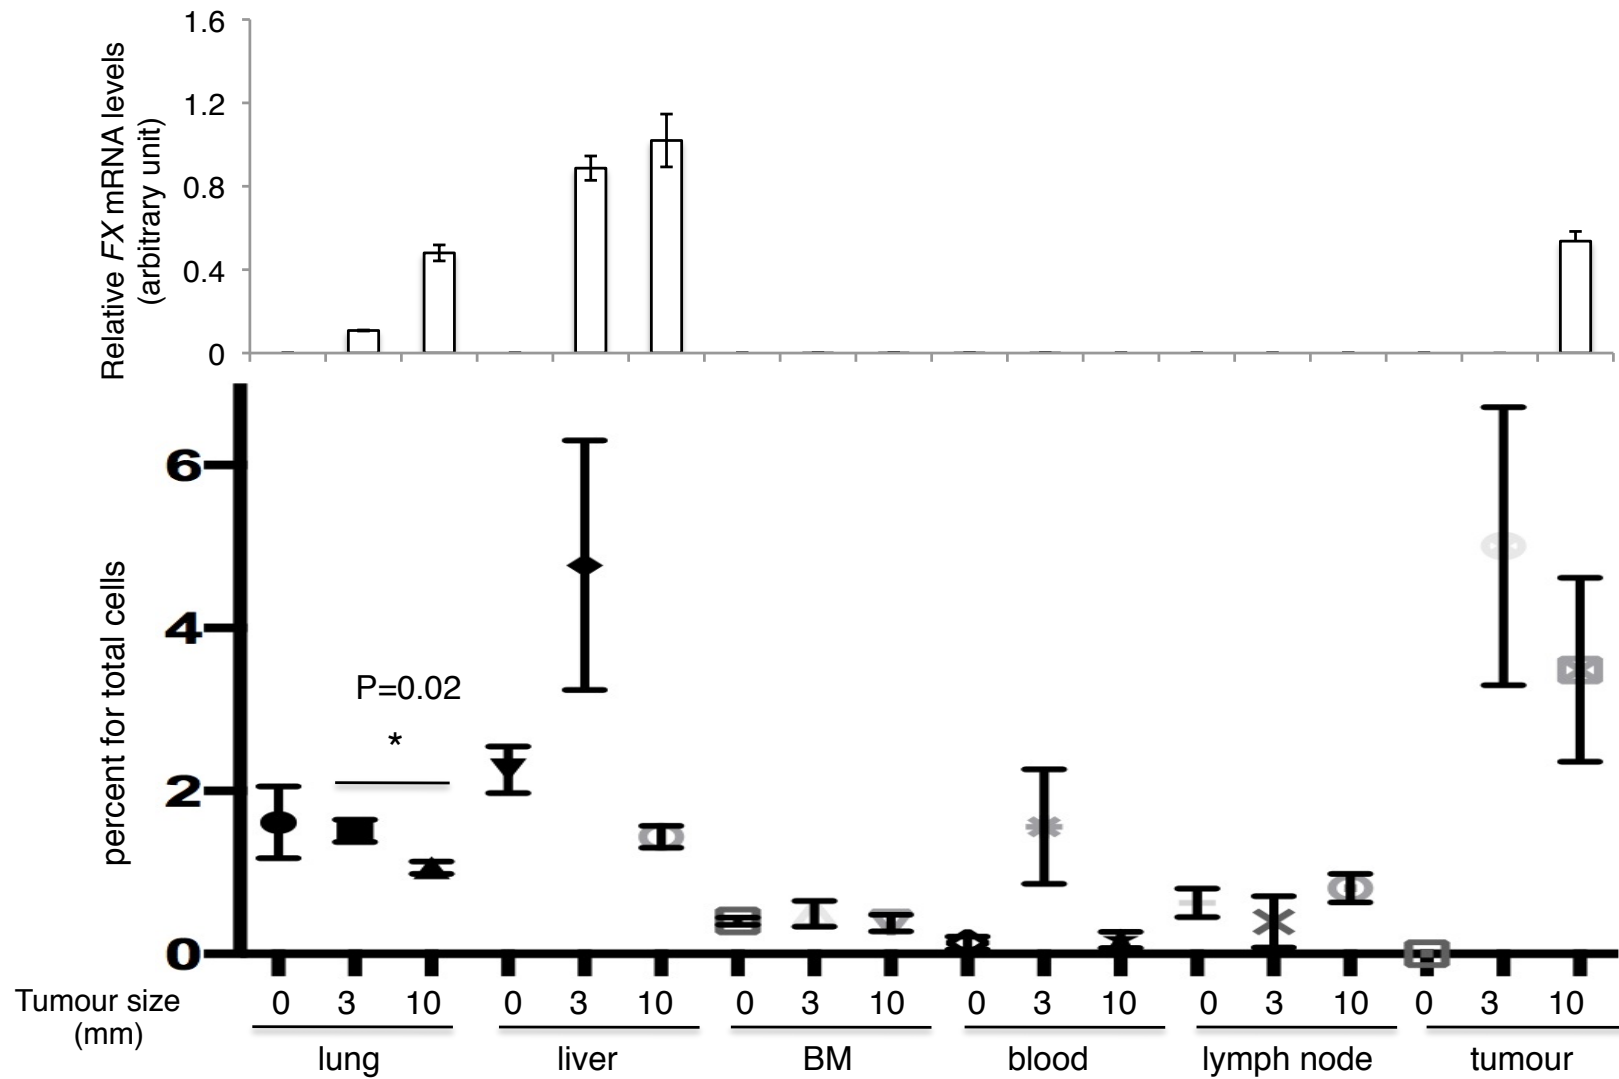

Tracing of B220<sup>+</sup>CD11c<sup>+</sup>NK1.1<sup>+</sup> cells in various organs such as lung, liver, bone marrow, peripheral blood, lymph node and primary tumours during the progression of tumour. The detection timing point is 0 mm in diameter of tumour (2 days), 3mm (7 days), and 10mm (14 days) after implantation of tumour cells. FX expression (upper) and flow cytometric analyses of B220<sup>+</sup>CD11c<sup>+</sup>NK1.1<sup>+</sup> cells (lower). N=4



# Appendix Fig. S8

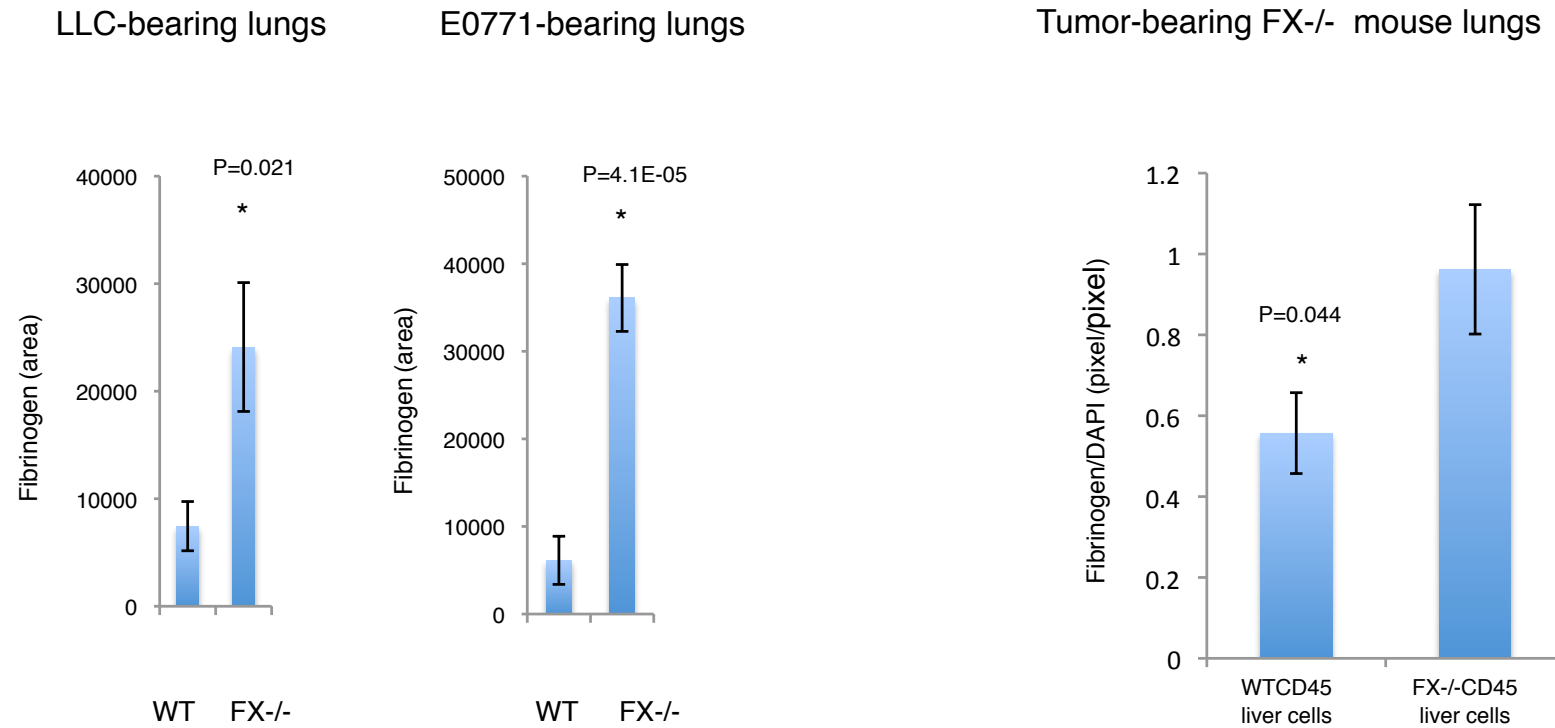

Quantification of fibrinogen deposition area in tumor-bearing wild-type (WT) and FX<sup>-/-</sup> mouse lungs (tumor-size matched analysis). N = 4, left.

Elimination of lung fibrinogen by liver CD45<sup>+</sup> cells derived from WT or FX<sup>-/-</sup> in tumor-bearing FX<sup>-/-</sup> mice. Quantification of fibrinogen area normalized by DAPI (lower). N = 4, right.

## Appendix Fig. S9

### Tumour-bearing FX<sup>-/-</sup> mouse lungs

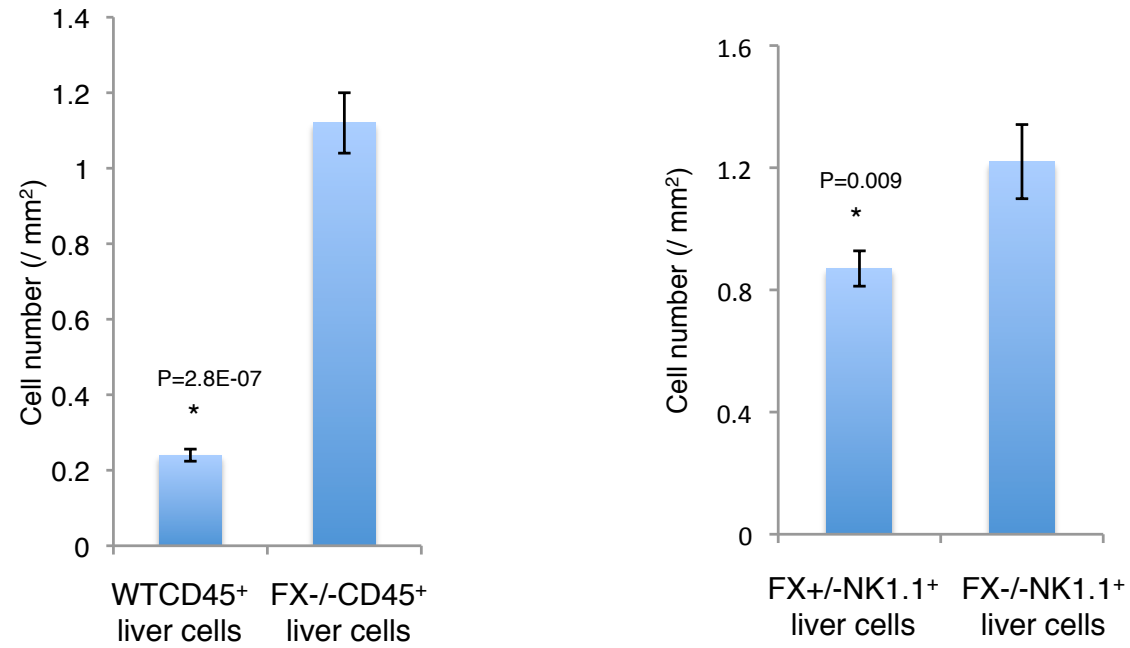

Metastatic tumor cells in tumor-bearing FX<sup>-/-</sup> mouse lungs that were treated with wild-type, FX<sup>+/-</sup> or FX<sup>-/-</sup> HepELs. Sorted cells were obtained with CD45<sup>+</sup> microbeads (left, N=5) and NK1.1<sup>+</sup> microbeads (right, N=3)

# Appendix Table S1

|            |              | Array data  |             | Fold change of tumour-bearing / no tumour-bearing |                                                     |          |
|------------|--------------|-------------|-------------|---------------------------------------------------|-----------------------------------------------------|----------|
|            |              | LLC-bearing | B16-bearing | mean                                              |                                                     |          |
| Arg1       | Gl:158966684 | 7.4         | 4.6         | 6                                                 | arginase, liver                                     |          |
|            |              | 5.5         | 6.2         | 5.85                                              |                                                     | BG060788 |
| Cspg2      | Gl:197333875 | 5.5         | 5.5         | 5.5                                               | versican                                            |          |
|            | Gl:12854022  | 5.6         | 5.2         | 5.4                                               |                                                     | BM251152 |
| Spp1       | Gl:323668331 | 7.5         | 2.1         | 4.8                                               | secreted phosphoprotein 1                           |          |
|            | Gl:13435848  | 4.9         | 4.5         | 4.7                                               |                                                     | BC004774 |
|            |              | 4.7         | 4.5         | 4.6                                               |                                                     | BG066773 |
|            |              | 4.9         | 4.2         | 4.55                                              |                                                     | BB747681 |
|            | Gl:12838759  | 5.3         | 3.8         | 4.55                                              |                                                     | AK005925 |
| Cdx4       | Gl:145966782 | 4.7         | 4.1         | 4.4                                               | caudal type homeobox 4                              |          |
| Adducin2   | Gl:6851281   | 3.9         | 4           | 3.95                                              | adducin2                                            |          |
| Scya2      | Gl:6531370   | 4           | 3.7         | 3.85                                              | monocyte chemoattractant protein (MCP)-1            |          |
|            |              | 4.9         | 2.8         | 3.85                                              |                                                     | BI106821 |
| Cldn13     | Gl:302564684 | 4.6         | 3.1         | 3.85                                              | claudin 13                                          |          |
|            |              | 3.6         | 4.1         | 3.85                                              |                                                     | BB323723 |
|            |              | 3.4         | 4.2         | 3.8                                               |                                                     | AW123502 |
|            | Gl:12856357  | 3.8         | 3.6         | 3.7                                               |                                                     | AK017223 |
|            |              | 4.7         | 2.3         | 3.5                                               |                                                     | AV326497 |
|            |              | 3.4         | 3.4         | 3.4                                               |                                                     | BB667300 |
|            |              | 3.2         | 3.5         | 3.35                                              |                                                     | BG071058 |
| Slc7a8     | Gl:8394324   | 3.3         | 3.3         | 3.3                                               | solute carrier family 7                             |          |
|            |              | 3           | 3.5         | 3.25                                              |                                                     | AA185889 |
| Mt1        | Gl:218931157 | 3.4         | 3           | 3.2                                               | metallothionein 1                                   |          |
|            | Gl:12852290  | 3.4         | 3           | 3.2                                               |                                                     | AK014439 |
|            |              | 3.4         | 2.9         | 3.15                                              |                                                     | AW108268 |
|            |              | 2.8         | 3.3         | 3.05                                              |                                                     | AV251542 |
| TfR        | Gl:54914     | 3           | 3           | 3                                                 | transferrin receptor                                |          |
| <b>F10</b> | Gl:334724423 | 2.8         | 3.2         | 3                                                 | coagulation factor X                                |          |
| Rnase4     | Gl:13542727  | 3.1         | 2.8         | 2.95                                              | ribonuclease, RNase A family 4                      |          |
|            |              | 2.9         | 3           | 2.95                                              |                                                     | AI415298 |
|            |              | 2.9         | 2.8         | 2.85                                              |                                                     | BB147418 |
|            |              | 2.9         | 2.8         | 2.85                                              |                                                     | BB451404 |
|            |              | 2.8         | 2.9         | 2.85                                              |                                                     | BB712040 |
| ATF5-beta  | Gl:14150812  | 3.4         | 2.2         | 2.8                                               | activating transcription factor 5-beta              |          |
|            |              | 3           | 2.6         | 2.8                                               |                                                     | AK015619 |
| acrosin    | Gl:201009    | 2.6         | 2.8         | 2.7                                               | acrosin                                             |          |
|            |              | 3.1         | 2.3         | 2.7                                               |                                                     | BB024472 |
|            |              | 2.8         | 2.6         | 2.7                                               |                                                     | BB140565 |
|            |              | 2.7         | 2.7         | 2.7                                               |                                                     | BF303544 |
|            |              | 3           | 2.2         | 2.6                                               |                                                     | BB754834 |
|            | Gl:12844551  | 2.8         | 2.4         | 2.6                                               |                                                     | AK009636 |
| Sh3d19     | Gl:7657563   | 2.9         | 2.2         | 2.55                                              | SH3 domain protein D19                              |          |
| Hr         | Gl:560879478 | 2.7         | 2.4         | 2.55                                              | hairless                                            |          |
|            |              | 2.9         | 2.2         | 2.55                                              |                                                     | AV290575 |
|            | Gl:12855447  | 2.5         | 2.4         | 2.45                                              |                                                     | AK016615 |
|            |              | 2.2         | 2.6         | 2.4                                               |                                                     | AK016969 |
| Arhe       | Gl:14290473  | 2.3         | 2.4         | 2.35                                              | Rho family GTPase 3                                 |          |
|            |              | 2.3         | 2.4         | 2.35                                              |                                                     | AK017968 |
| Ms4a6d     | Gl:119637843 | 2.5         | 2.1         | 2.3                                               | membrane-spanning 4-domains, subfamily A, member 6D |          |
| Hmox1      | Gl:195947362 | 2.1         | 2.4         | 2.25                                              | heme oxygenase (decycling) 1                        |          |

A list of the top 50 genes that were significantly up-regulated in peripheral leukocytes in LLC-bearing or B16-bearing mice. A comparison of the gene expression level between tumour-bearing- and non-tumour-bearing- mouse leukocytes shown as fold changes. Coagulation factor X (FX=F10) is shown as red.

## Appendix Table S2

| lung > liver |               |             | liver > lung |                                |             |
|--------------|---------------|-------------|--------------|--------------------------------|-------------|
| Probe name   | Gene symbol   | Fold change | Probe name   | Gene symbol                    | Fold change |
| 1458504_at   | Zc3h12d       | 6.192023    | 1455098_a_at | Vtn                            | -9.335761   |
| 1435447_at   | Mip           | 6.1570253   | 1449193_at   | Cd5l                           | -7.4024057  |
| 1416841_at   | 1110059E24Rik | 5.757809    | 1443570_at   | Cops3                          | -7.0647583  |
| 1447329_at   |               | 5.2908344   | 1445639_at   | 9130014G24Rik                  | -6.8324075  |
| 1431102_at   | Cep350        | 5.209877    | 1449084_s_at | Sh3d19                         | -6.6454644  |
| 1436692_at   |               | 5.1653757   | 1454892_at   | Pitpnb                         | -6.6453357  |
| 1421811_at   | Thbs1(TSP)    | 5.141252    | 1417378_at   | Cadm1                          | -6.5729446  |
| 1458730_at   |               | 5.0260763   | 1450779_at   | Fabp7                          | -6.561568   |
| 1455796_x_at | Olfm1         | 5.004083    | 1422814_at   | Aspm                           | -6.4956884  |
| 1438525_at   | Milt10        | 4.9534855   | 1422595_s_at | 5730470L24Rik                  | -6.4695883  |
| 1420788_at   | Klrg1         | 4.9360604   | 1445388_at   | Cd226                          | -6.4644823  |
| 1419038_a_at | Csnk2a1       | 4.928009    | 1448680_at   | LOC100046946 //<br>/ Serpina1c | -6.375888   |
| 1450700_at   | Cdc42ep3      | 4.904225    | 1420064_s_at | Tktl1                          | -6.3682814  |
| 1442928_at   |               | 4.759984    | 1450624_at   | Bhmt                           | -6.3638434  |
| 1420659_at   | Slamf6        | 4.735423    | 1444263_at   |                                | -6.3079257  |
| 1444128_at   | Arhgap26      | 4.727369    | 1459742_at   |                                | -6.277002   |
| 1443919_at   | Prnt3         | 4.669039    | 1416931_at   | Nif3l1                         | -6.2696247  |
| 1429997_at   | 4832441B07Rik | 4.623043    | 1429921_at   | 9530068E07Rik                  | -6.250474   |
| 1427381_at   | Irg1          | 4.59012     | 1452319_at   | Zfp82                          | -6.191312   |
| 1457948_at   | Gas7          | 4.5334888   | 1416225_at   | Adh1                           | -6.1089277  |

Gene expression in photoconverted HepELs derived from TCM-stimulated- lungs and livers.

Top 20 up-regulated genes in HepELs that migrated from the liver to the lung compared with those that stayed in the liver in TCM-stimulating mice (left). Top 20 up-regulated genes in non-migrating HepELs in the liver compared to HepELs in lungs in the same mice (right). To perform this microarray analysis, complementary DNAs obtained from five mice were combined before the hybridization process. The fold changes of mRNA levels in liver versus lung were shown. The fibrinogen-binding molecules have been reported as red.
