# Supplementary material for: Hepato‐entrained B220+ CD11c+ NK1.1+ cells regulate pre‐metastatic niche formation in the lung
Source: PubMed Central journal article supplement (PMC6034134; doi:10.15252/emmm.201708643), 2018-06-21

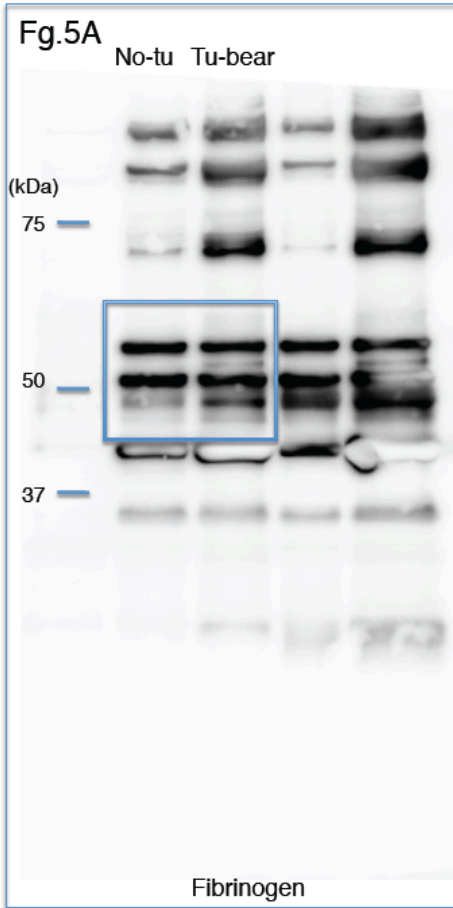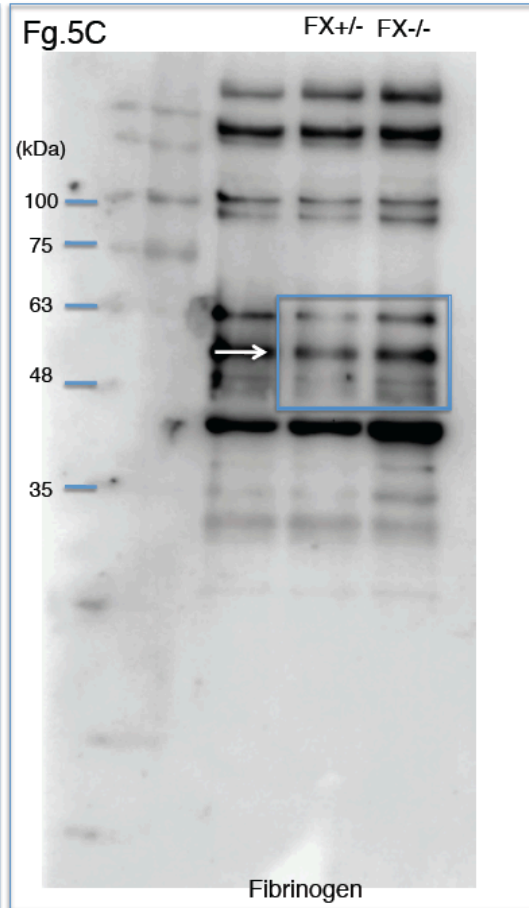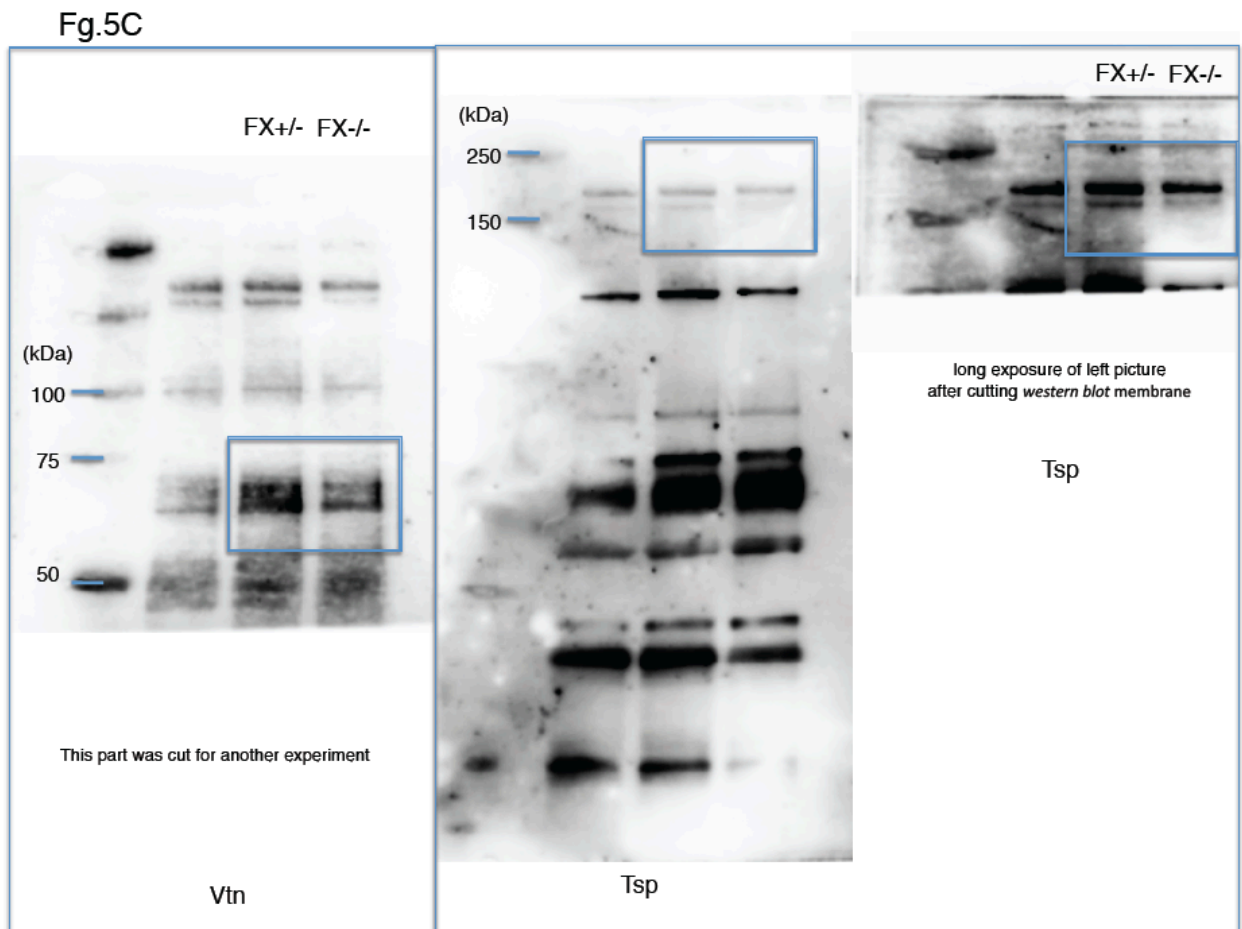

Supplement: EMMM-10-e8643-s003.pdf [file EMMM-10-e8643-s003.pdf]
